# Supplementary material for: Prolonged Length of Stay in the Emergency Department and Increased Risk of In-Hospital Cardiac Arrest: A nationwide Population-Based Study in South Korea, 2016–2017
Source: MDPI journal article supplement (doi:10.3390/jcm9072284), 2020-07-18
Supplement: s1 [file s1]

**Table S1. Baseline demographic and clinical characteristics of emergency department patients with and without in-hospital cardiac arrest (IHCA) within one hour**

| <b>Variables</b>                                  | <b>Total<br/>(N = 832,226)</b> | <b>No IHCA<br/>(N = 831,353)</b> | <b>IHCA<br/>(N = 873)</b> | <b>p-<br/>value</b> |
|---------------------------------------------------|--------------------------------|----------------------------------|---------------------------|---------------------|
| Age                                               | 45.0 (32.0 – 59.0)             | 45.0 (32.0 – 59.0)               | 63.0 (53.0 – 75.0)        | < 0.01              |
| Male                                              | 404,230 (48.6)                 | 403,591 (48.5)                   | 639 (73.2)                | < 0.01              |
| MAP (mmHg) <sup>†</sup>                           | 93.3 (86.7 – 103.7)            | 93.3 (86.7 – 103.7)              | 90.7 (73.0 – 106.7)       | < 0.01              |
| Pulse rate, bpm <sup>†</sup>                      | 80.0 (72.0 – 88.0)             | 80.0 (72.0 – 88.0)               | 92.0 (76.0 – 110.0)       | < 0.01              |
| Respiratory rate,<br>breaths per min <sup>†</sup> | 20.0 (18.0 – 20.0)             | 20.0 (18.0 – 20.0)               | 20.0 (18.0 – 22.0)        | < 0.01              |
| LOS in ED<br>(hours)                              | 0.5 (0.2 – 0.8)                | 0.5 (0.2 – 0.8)                  | 0.7 (0.6 – 0.9)           | < 0.01              |
| Cancer                                            | 23,071 (2.8)                   | 23,035 (2.8)                     | 36 (4.1)                  | < 0.01              |
| Not alert <sup>††</sup>                           | 25,995 (3.1)                   | 25,458 (3.1)                     | 537 (61.5)                | < 0.01              |
| KTAS level 1                                      | 18,816 (2.3)                   | 18,274 (2.2)                     | 542 (62.1)                | < 0.01              |
| ICU admission                                     | 17,927 (2.2)                   | 17,289 (2.1)                     | 638 (73.1)                | < 0.01              |
| Mortality                                         | 3,346 (0.4)                    | 3,136 (0.4)                      | 210 (24.1)                | < 0.01              |

Data are presented as median (interquartile range [IQR]) or as number (percentage). <sup>†</sup> Vital signs were checked on ED arrival. <sup>††</sup> Glasgow Coma Scale < 13. Abbreviations: IHCA = in-hospital cardiac arrest; MAP = mean arterial pressure; ED = emergency department; KTAS = Korean triage acuity scale; ICU = intensive care unit.

**Table S2. Baseline demographic and clinical characteristics of emergency department patients with in-hospital cardiac arrest (IHCA) within and after one hour**

| <b>Variables</b>                                  | <b>After 1 hour<br/>(N = 9,180)</b> | <b>Within 1 hour<br/>(N = 873)</b> | <b>p-<br/>value</b> |
|---------------------------------------------------|-------------------------------------|------------------------------------|---------------------|
| Age                                               | 68.0 (55.0–78.0)                    | 63.0 (53.0 – 75.0)                 | < 0.01              |
| Male                                              | 6,036 (65.8)                        | 639 (73.2)                         | < 0.01              |
| MAP (mmHg) <sup>†</sup>                           | 87.3 (70.0–104.0)                   | 90.7 (73.0 – 106.7)                | < 0.01              |
| Pulse rate, bpm <sup>†</sup>                      | 95.0 (78.0–114.0)                   | 92.0 (76.0 – 110.0)                | < 0.01              |
| Respiratory rate,<br>breaths per min <sup>†</sup> | 20.0 (18.0–22.0)                    | 20.0 (18.0 – 22.0)                 | < 0.01              |
| LOS in ED<br>(hours)                              | 4.2 (2.4–9.3)                       | 0.7 (0.6 – 0.9)                    | < 0.01              |
| Cancer                                            | 1,032 (11.2)                        | 36 (4.1)                           | < 0.01              |
| Not alert <sup>††</sup>                           | 5,006 (54.5)                        | 537 (61.5)                         | < 0.01              |
| KTAS level 1                                      | 4,416 (48.1)                        | 542 (62.1)                         | < 0.01              |
| ICU admission                                     | 5,375 (58.6)                        | 638 (73.1)                         | < 0.01              |
| Mortality                                         | 3,277 (35.7)                        | 210 (24.1)                         | < 0.01              |

Data are presented as median (interquartile range [IQR]) or as number (percentage). <sup>†</sup> Vital signs were checked on ED arrival. <sup>††</sup> Glasgow Coma Scale < 13. Abbreviations: IHCA = in-hospital cardiac arrest; MAP = mean arterial pressure; ED = emergency department; KTAS = Korean triage acuity scale; ICU = intensive care unit.

**Table S3. Top 10 categories for ED diagnosis**

| No IHCA (N = 5,817,436)                |                | IHCA (N = 9,180)             |              |
|----------------------------------------|----------------|------------------------------|--------------|
| Diagnosis                              | Frequency      | Diagnosis                    | Frequency    |
| Gastrointestinal                       | 890,185 (15.3) | Primary cardiac<br>(non-AMI) | 2,383 (26.0) |
| Nontraumatic<br>neurologic<br>disorder | 471,379 (8.1)  | Primary respiratory          | 1,629 (17.7) |
| Primary<br>respiratory                 | 219,586 (3.8)  | AMI                          | 1,377 (4.1)  |
| Urology                                | 171,588 (2.9)  | Others                       | 154 (1.7)    |
| Unspecified<br>fever                   | 108,365 (1.9)  | Sepsis                       | 153 (1.7)    |
| Others                                 | 94,885 (1.6)   | Gastrointestinal             | 142 (1.3)    |
| Urticaria                              | 77,566 (1.3)   | Cerebrovascular              | 134 (1.4)    |
| Dyspnea                                | 51,611 (0.9)   | Chronic kidney<br>disease    | 75 (0.1)     |
| Primary cardiac                        | 49,089 (0.1)   | Trauma                       | 61 (0.1)     |
| Trauma                                 | 46,565 (0.1)   | Acute Kidney<br>Injury       | 58 (0.1)     |

Data are presented as number (percentage). Abbreviations: ED = emergency department; IHCA = in-hospital cardiac arrest; AMI = acute myocardial infarction.
